# Supplementary material for: Simultaneous Determination of Enantiomeric Purity and Organic Impurities of Dexketoprofen Using Reversed-Phase Liquid Chromatography—Enhancing Enantioselectivity through Hysteretic Behavior and Temperature-Dependent Enantiomer Elution Order Reversal on Polysaccharide Chiral Stationary Phases
Source: MDPI journal article supplement (doi:10.3390/ijms25052697), 2024-02-26
Supplement: s1 [file s1]

# SUPPLEMENTARY MATERIALS

## **Simultaneous Determination of Enantiomeric and Organic Impurities of Dexketoprofen Using Reversed-Phase Liquid Chromatography. Fine-Tuning Enantioselectivity through Hysteretic Behavior and Temperature-Dependent Enantiomer Elution Order on Polysaccharide Chiral Stationary Phases**

**Máté Dobó<sup>1</sup>, Gergely Dombi<sup>1</sup>, István Köteles<sup>1</sup>, Béla Fiser<sup>2,3,4</sup>, Csenge Kis<sup>5</sup>, Zoltán-István Szabó<sup>5,6</sup>, Gergő**

<sup>1</sup> Department of Pharmaceutical Chemistry, Semmelweis University, Budapest H-1085, Hungary;

<sup>2</sup> Institute of Chemistry, University of Miskolc, 3515 Miskolc-Egyetemváros, Hungary;

<sup>3</sup> Ferenc Rákóczi II. Transcarpathian Hungarian College of Higher Education, 90200 Beregszász, Transcarpathia, Ukraine

<sup>4</sup> Department of Physical Chemistry, Faculty of Chemistry, University of Lodz, Lodz, Poland

<sup>5</sup> Department of Pharmaceutical Industry and Management, George Emil Palade University of Medicine, Pharmacy, Science, and Technology of Targu Mures, Gh. Marinescu 38, Targu Mures, Romania

<sup>6</sup> Sz-imfidum Ltd, Lunga nr. 504, Romania

Correspondence: [toth.gergo@semmelweis.hu](mailto:toth.gergo@semmelweis.hu)

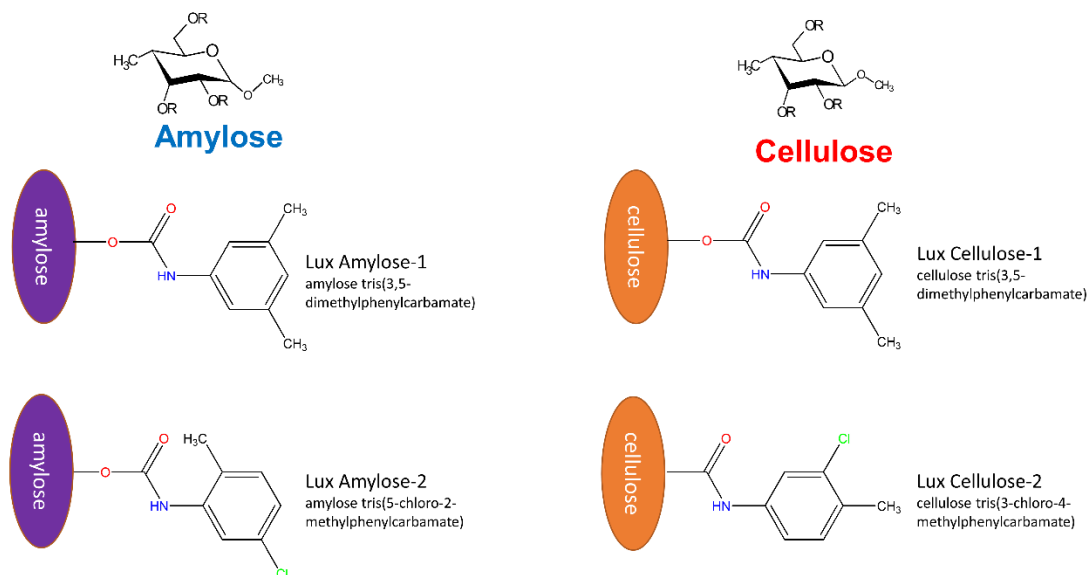

Supplementary Figure S1. The structure of the chiral selectors

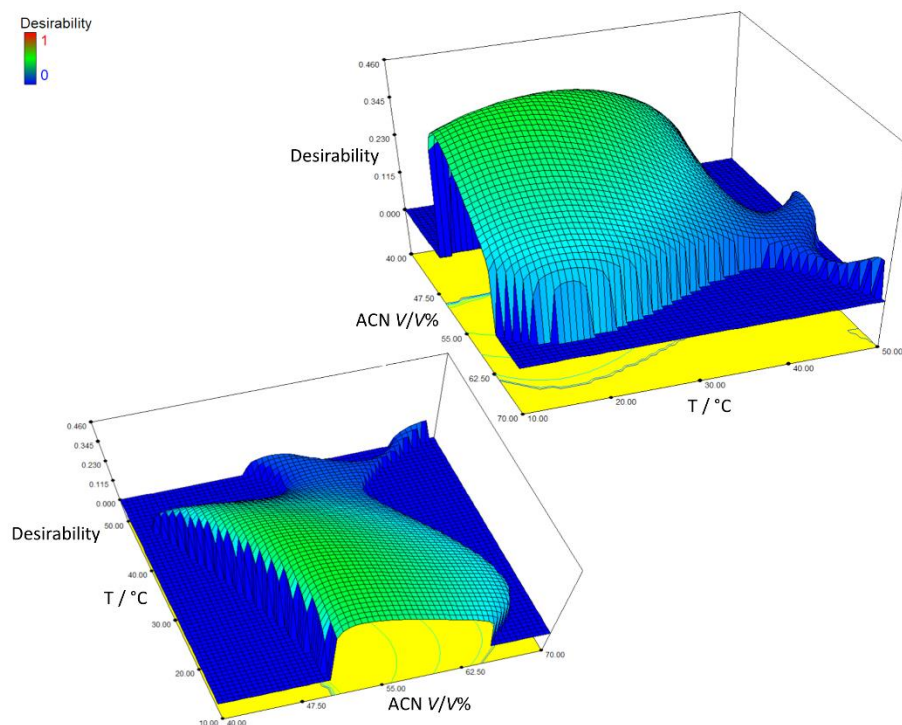

Supplementary Figure S2. Three-dimensional response surface plots obtained for desirability.

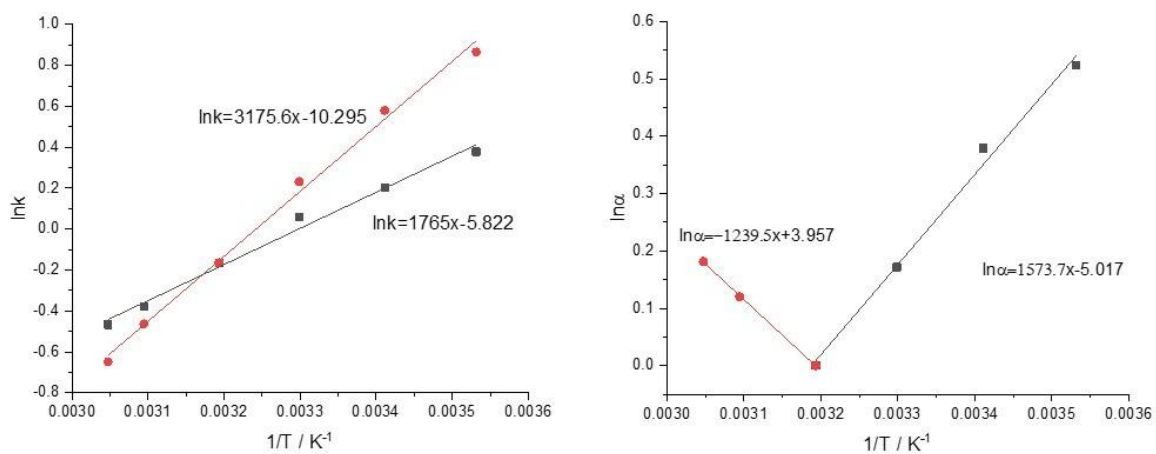

**Supplementary Figure S3.**  $\ln k$  vs.  $1/T$  (left) and  $\ln \alpha$  vs.  $1/T$  (right) plots for the separation of ketoprofen enantiomers on Lux amylose-2 column. (Mobile phase: water/ACN/acetic acid 50/50/0.1 (v/v/v), flow rate: 1 mL/min)
